# Supplementary material
Source: HighWire-hosted journal article supplement (https://erj.ersjournals.com/content/56/1/1901829)

**Supplementary materials to**  
***Chlamydia trachomatis* during pregnancy and childhood asthma-related morbidity: a**  
**population-based prospective cohort**

Running title: Maternal Chlamydia and childhood asthma morbidity

*Author affiliations:*

Evelien R. van Meel, MD<sup>1,2</sup>, Marina Attanasi, MD<sup>1,2</sup>, Vincent W.V. Jaddoe, MD PhD<sup>1,3</sup>, Irwin  
K.M. Reiss, MD PhD<sup>4</sup>, Henriëtte A. Moll, MD PhD<sup>3</sup>, Johan C. de Jongste, MD PhD<sup>2</sup>, Liesbeth  
Duijts, MD PhD<sup>2,4</sup>

<sup>1</sup>The Generation R Study Group, Erasmus MC, University Medical Center Rotterdam,  
Rotterdam, the Netherlands;

<sup>2</sup>Department of Pediatrics, Division of Respiratory Medicine and Allergology, Erasmus MC,  
University Medical Center Rotterdam, Rotterdam, the Netherlands;

<sup>3</sup>Department of Pediatrics, Erasmus MC, University Medical Center Rotterdam. Rotterdam,  
the Netherlands;

<sup>4</sup>Department of Pediatrics, Division of Neonatology; Erasmus MC, University Medical Center  
Rotterdam;

**Supplementary Table S1.** Differences between those included and not included in the study

**Supplementary Table S2.** Associations of *Chlamydia trachomatis* infection during pregnancy with lower respiratory tract infections from age 1 to 6 years

**Supplementary Table S3.** Associations of *Chlamydia trachomatis* infection during pregnancy with wheezing from age 1 to 10 years

**Supplementary Figure S1.** Directed acyclic graph (DAG) of exposure, outcome and possible covariates

**Supplementary Table S1.** Differences between those included and not included in the study

|                                                   | Included<br>n = 2,475 | Not included<br>n = 1,580 | P-value |
|---------------------------------------------------|-----------------------|---------------------------|---------|
| <b>Maternal characteristics</b>                   |                       |                           |         |
| Age, mean (SD), y                                 | 30.76 (4.82)          | 27.96 (5.49)              | <0.001  |
| Caesarian section, No. (%)                        | 275 (12.3)            | 170 (13.1)                | 0.523   |
| Low/middle education level, No. (%)               | 1,117 (47.7)          | 947 (72.2)                | <0.001  |
| Maternal psychiatric symptoms, median (IQR)       | 0.15 (0.06, 0.33)     | 0.25 (0.10, 0.52)         | 0.006   |
| Smoking during pregnancy, No. (%)                 | 520 (24.0)            | 24 (32.4)                 | 0.098   |
| Alcohol use during pregnancy, No. (%)             | 1,239 (58.2)          | 492 (39.0)                | <0.001  |
| <i>Chlamydia trachomatis</i> infection, No. (%)   | 78 (3.2)              | 79 (5.0)                  | 0.003   |
| <b>Child's characteristics</b>                    |                       |                           |         |
| Female sex, No. (%)                               | 1,230 (49.7)          | 713 (47.4)                | 0.155   |
| Gestational age at birth, median (IQR), weeks     | 40.1 (39.3, 41.0)     | 39.9 (38.9, 40.9)         | <0.001  |
| Birth weight, mean (SD), grams                    | 3,447 (543)           | 3,344 (612)               | <0.001  |
| European ethnicity, No. (%)                       | 1,621 (66.5)          | 636 (45.3)                | <0.001  |
| Ever breastfeeding, No. (%)                       | 1,977 (93.5)          | 41 (91.1)                 | 0.527   |
| Day care attendance 1 <sup>st</sup> year, No. (%) | 1,021 (61.8)          | 11 (52.4)                 | 0.377   |

Abbreviation: IQR, interquartile range. Differences between groups were evaluated using t-tests for continuous variables, chi-square tests for categorical variables or Mann-Whitney U tests for non-normal distributed variables. Values are based on observed data.

**Supplementary Table S2.** Associations of *Chlamydia trachomatis* infection during pregnancy with lower respiratory tract infections from age 1 to 6 years

|                                                                                        | Lower respiratory tract infections<br>Odds Ratio (95% Confidence Interval) |                   |                   |                          |                   |                   |
|----------------------------------------------------------------------------------------|----------------------------------------------------------------------------|-------------------|-------------------|--------------------------|-------------------|-------------------|
|                                                                                        | 1 year                                                                     | 2 years           | 3 years           | 4 years                  | 6 years           | Overall           |
| <b><i>Chlamydia trachomatis</i><br/>infection during pregnancy<br/>(yes versus no)</b> |                                                                            |                   |                   |                          |                   |                   |
| Crude model                                                                            | 1.24 (0.56, 2.75)                                                          | 0.6 (0.31, 1.47)  | 1.15 (0.52, 2.52) | <b>2.25 (1.17, 4.34)</b> | 1.51 (0.71, 3.18) | 0.85 (0.54, 1.35) |
| <i>p</i> -value                                                                        | 0.589                                                                      | 0.320             | 0.737             | 0.016                    | 0.283             | 0.500             |
| Confounder model <sup>a</sup>                                                          | 1.00 (0.33, 3.04)                                                          | 0.49 (0.17, 1.38) | 1.29 (0.46, 3.60) | 1.50 (0.37, 6.14)        | 0.77 (0.19, 3.20) | 0.95 (0.57, 1.59) |
| <i>p</i> -value                                                                        | 0.996                                                                      | 0.191             | 0.633             | 0.576                    | 0.723             | 0.855             |
| Full model <sup>b</sup>                                                                | 0.95 (0.57, 1.59)                                                          | 1.03 (0.18, 1.42) | 1.32 (0.47, 3.69) | 1.54 (0.38, 6.25)        | 0.79 (0.19, 3.27) | 0.95 (0.57, 1.59) |
| <i>p</i> -value                                                                        | 0.961                                                                      | 0.197             | 0.601             | 0.550                    | 0.749             | 0.735             |

Values are odds ratios with 95% confidence interval from generalized estimating equation models. <sup>a</sup>Adjusted for maternal age, educational level, psychiatric symptoms, and smoking and alcohol use during pregnancy, and child's ethnicity, breastfeeding and day care attendance in the first year of life. <sup>b</sup>Additionally adjusted for mode of delivery, gestational age at birth and birth weight.

**Supplementary Table S3.** Associations of *Chlamydia trachomatis* infection during pregnancy with wheezing from age 1 to 10 years

|                                                                                                    | Wheezing                             |                   |                          |                          |                   |                   |                          |
|----------------------------------------------------------------------------------------------------|--------------------------------------|-------------------|--------------------------|--------------------------|-------------------|-------------------|--------------------------|
|                                                                                                    | Odds Ratio (95% Confidence Interval) |                   |                          |                          |                   |                   |                          |
|                                                                                                    | 1 year                               | 2 years           | 3 years                  | 4 years                  | 6 years           | 10 years          | Overall                  |
| <b><i>Chlamydia trachomatis</i></b><br><b>infection during pregnancy</b><br><b>(yes versus no)</b> |                                      |                   |                          |                          |                   |                   |                          |
| Crude model                                                                                        | 1.24 (0.77, 1.99)                    | 1.14 (0.67, 1.95) | <b>3.30 (2.05, 5.31)</b> | <b>2.36 (1.43, 3.89)</b> | 1.13 (0.56, 2.29) | 1.58 (0.90, 2.77) | <b>2.03 (1.50, 2.75)</b> |
| <i>p</i> -value                                                                                    | 0.378                                | 0.624             | <0.001                   | 0.001                    | 0.734             | 0.112             | <0.001                   |
| Confounder model <sup>a</sup>                                                                      | 1.31 (0.72, 2.38)                    | 1.22 (0.66, 2.24) | <b>2.09 (1.10, 3.96)</b> | 1.41 (0.64, 3.12)        | 1.23 (0.56, 2.69) | 2.06 (0.88, 4.83) | <b>1.50 (1.10, 2.03)</b> |
| <i>p</i> -value                                                                                    | 0.374                                | 0.529             | 0.028                    | 0.399                    | 0.551             | 0.100             | 0.013                    |
| Full model <sup>b</sup>                                                                            | 1.31 (0.72, 2.38)                    | 1.22 (0.66, 2.24) | <b>2.09 (1.10, 3.96)</b> | 1.41 (0.64, 3.12)        | 1.27 (0.58, 2.79) | 2.06 (0.88, 4.83) | <b>1.47 (1.09, 1.99)</b> |
| <i>p</i> -value                                                                                    | 0.374                                | 0.529             | 0.028                    | 0.399                    | 0.551             | 0.100             | 0.015                    |

Values are odds ratios with 95% confidence interval from generalized estimating equation models. <sup>a</sup>Adjusted for maternal age, educational level, psychiatric symptoms, and smoking and alcohol use during pregnancy, and child's ethnicity, breastfeeding and day care attendance in the first year of life. <sup>b</sup>Additionally adjusted for mode of delivery, gestational age at birth and birth weight.

**Supplementary Figure S1.** Directed acyclic graph (DAG) of exposure, outcome and possible covariates

Minimal sufficient adjustment for estimating the total effect of *Chlamydia trachomatis* on respiratory health:  
maternal age, maternal education, maternal stress, smoking during pregnancy, alcohol during pregnancy, ethnicity of the child, breastfeeding, daycare attendance.

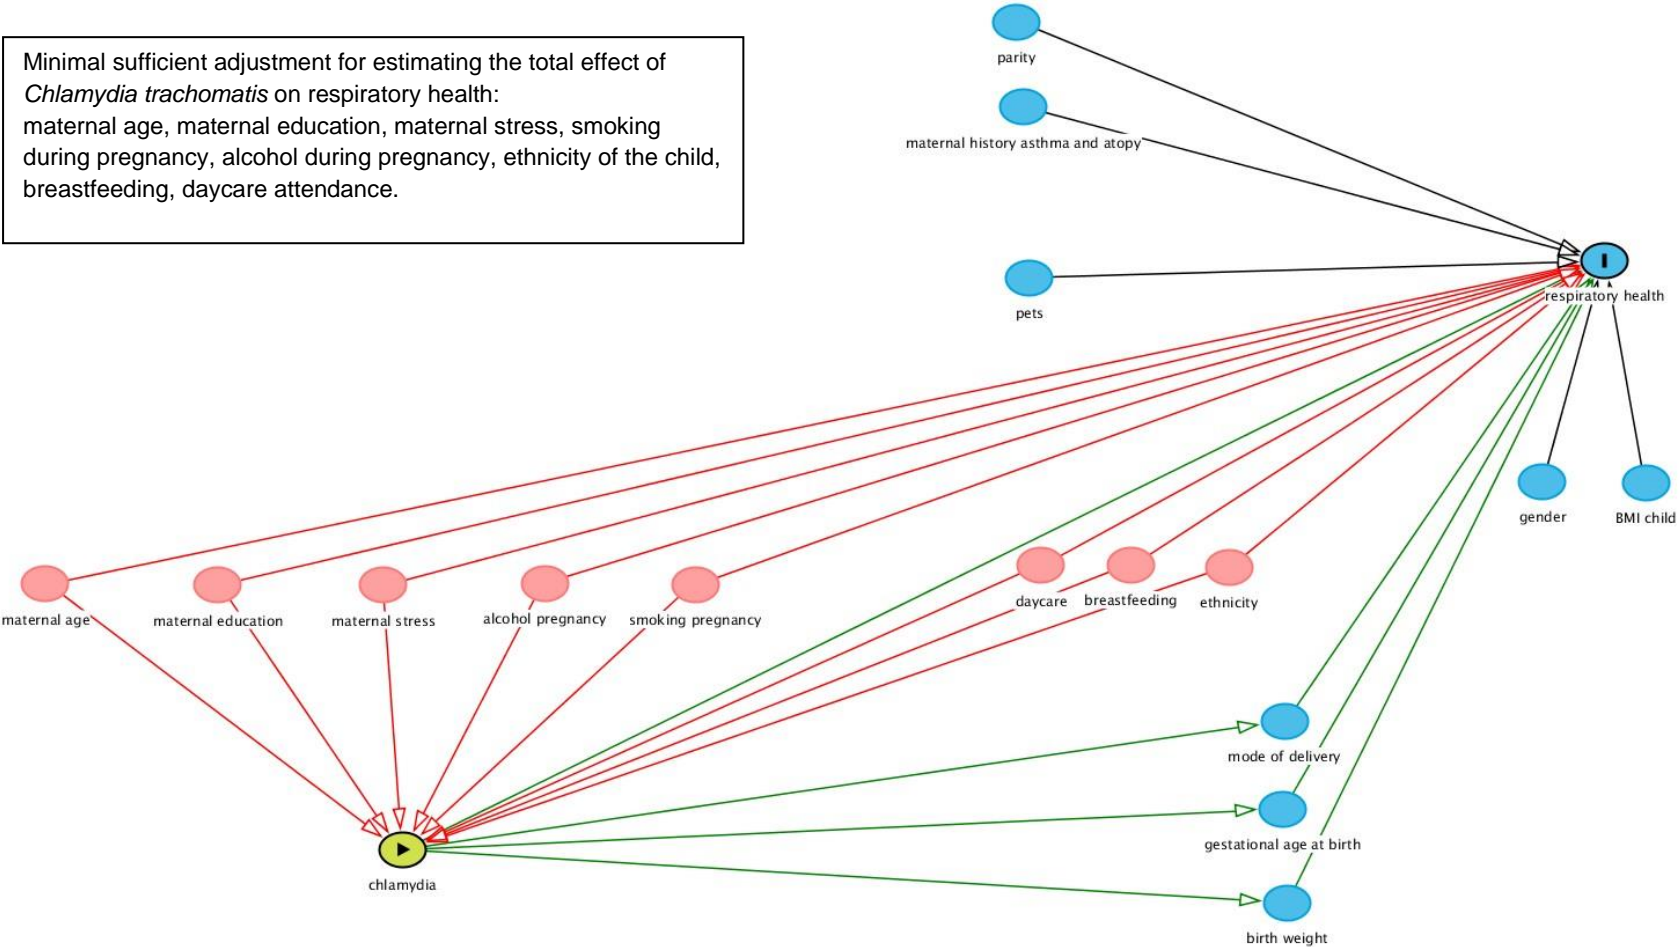

Supplement: inline-supplementary-material-1 [file inline-supplementary-material-1.pdf]
