# Supplementary material
Source: HighWire-hosted journal article supplement (https://erj.ersjournals.com/content/56/1/1901829)
Supplement: inline-supplementary-material-2 [file inline-supplementary-material-2.pdf]

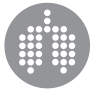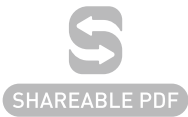

# *Chlamydia trachomatis* during pregnancy and childhood asthma-related morbidity: a population-based prospective cohort

Evelien R. van Meel<sup>1,2</sup>, Marina Attanasi<sup>1,2</sup>, Vincent W.V. Jaddoe<sup>1,3</sup>, Irwin K.M. Reiss<sup>4</sup>, Henriëtte A. Moll<sup>3</sup>, Johan C. de Jongste<sup>2</sup> and Liesbeth Duijts <sup>2,4</sup>

**Affiliations:** <sup>1</sup>The Generation R Study Group, Erasmus MC, University Medical Center Rotterdam, Rotterdam, The Netherlands. <sup>2</sup>Dept of Pediatrics, Division of Respiratory Medicine and Allergology, Erasmus MC, University Medical Center Rotterdam, Rotterdam, The Netherlands. <sup>3</sup>Dept of Pediatrics, Erasmus MC, University Medical Center Rotterdam, Rotterdam, The Netherlands. <sup>4</sup>Dept of Pediatrics, Division of Neonatology, Erasmus MC, University Medical Center Rotterdam, Rotterdam, The Netherlands.

**Correspondence:** Liesbeth Duijts, Erasmus MC, University Medical Center Rotterdam, Sp-3435, PO Box 2060, 3000 CB Rotterdam, The Netherlands. E-mail: l.duijts@erasmusmc.nl

 @ERSpublications

***Chlamydia trachomatis* infection during pregnancy is associated with increased odds of wheezing and asthma, and impaired lung function in childhood, and may be a target for prevention strategies focused on improving offspring respiratory health** <https://bit.ly/34fSXda>

**Cite this article as:** van Meel ER, Attanasi M, Jaddoe VWV, et al. *Chlamydia trachomatis* during pregnancy and childhood asthma-related morbidity: a population-based prospective cohort. *Eur Respir J* 2020; 56: 1901829 [<https://doi.org/10.1183/13993003.01829-2019>].

This single-page version can be shared freely online.

## ABSTRACT

**Introduction:** *Chlamydia trachomatis* is the most commonly reported sexually transmitted disease and although infection during pregnancy is associated with neonatal complications, long-term respiratory consequences are unknown. We aimed to determine whether *C. trachomatis* infection during pregnancy is associated with asthma-related symptoms across childhood

**Methods:** This study among 2475 children and their mothers was embedded in a population-based prospective cohort study. Maternal urine samples were tested for *C. trachomatis* infection during pregnancy. Questionnaires provided information on childhood physician-attended lower respiratory tract infections and wheezing, and current asthma at age 10 years. Lung function was measured by spirometry at age 10 years.

**Results:** The prevalence of *C. trachomatis* infection during pregnancy was 3.2% (78 out of 2475). *C. trachomatis* infection during pregnancy was not associated with lower respiratory tract infections until age 6 years, but was associated with a higher odds of wheezing in children until age 10 years (OR 1.50 (95% CI 1.10–2.03)). *C. trachomatis* infection during pregnancy was associated with an increased odds of asthma (OR 2.29 (95% CI 1.02–5.13)), and with a lower forced expiratory volume in 1 s/forced vital capacity and forced expiratory flow at 75% of forced vital capacity (z-score difference –0.28 (95% CI –0.52––0.04) and –0.24 (95% CI –0.46––0.01), respectively) in children at age 10 years. The observed associations were only partly explained by mode of delivery, gestational age at birth or birthweight.

**Conclusions:** *C. trachomatis* infection during pregnancy is associated with increased odds of wheezing, asthma and impaired lung function. The causality of the observed associations and potential underlying mechanisms need to be explored.
